# Supplementary material for: 3D printing vs traditional workflow for the fabrication of mandibular implant overdentures: study protocol for a mixed-methods cross-over RCT
Source: Springer Nature journal article supplement (doi:10.1186/s13063-024-08097-7), 2024-04-16
Supplement: MOESM3 [file 26985648]

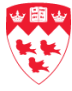

**McGill**

Faculty of  
Medicine and  
Health Sciences

Faculté de  
médecine et des  
sciences de la santé

3655 Sir William Osler #633  
Montreal, Quebec H3G 1Y6

3655, Promenade Sir William Osler #633  
Montréal (Québec) H3G 1Y6

Tél/Tel: (514) 398-3124

September 21, 2023

Dr. Raphael F. de Souza  
Faculty of Dental Medicine and Oral Health Sciences  
2001, ave McGill College, Suite 534  
Montreal, QC H3A 1G1

**RE: A00-M29-23B (22-07-089)**  
*3D printing vs traditional workflow for the fabrication of implant mandibular  
overdentures: A randomized cross-over clinical trial*

Dear Dr. de Souza,

On September 11, 2023, at a meeting of the Institutional Review Board, the above-referenced re-submitted study received a full Board review.

The Committee identified the following concerns for your response.

**Study Protocol**

- a) Science of the study is acceptable.

**Consent form**

- b) Consent form needs to be on letterhead.
- c) Please clarify if data is coded or anonymized. If the data is to be kept for 25 years, it needs to be anonymized.

The study was approved for a period of 12 months, pending the submission of an appropriate response and revisions to the above concerns.

Please send all correspondence to [submit2irb.med@mcgill.ca](mailto:submit2irb.med@mcgill.ca).

Kind regards,

Roberta Palmour, PhD  
Chair  
Institutional Review Board

cc: A00-M29-23B (22-07-089)
